# Supplementary material for: The role of reducing agent in perylene tetracarboxylic acid coating on graphene sheets enhances Pd nanoparticles-electrocalytic ethanol oxidation
Source: Royal Society of Chemistry journal article supplement (doi:10.1039/c3cy00275f), 2013-01-01
Supplement: c3cy00275f.pdf [file c3cy00275f.pdf]

## Supplementary Information

### **The role of reducing agent in Perylene tetracarboxylic acid coating on graphene sheets enhances Pd nanoparticles-electrocatalytic ethanol oxidation**

**Shuwen Li, Honglei Yang, Zhengping Dong, Shujing Guo, Jiahui Zhao, Galian  
Gou, Ren Ren , Jingwei, Huang, Jun Jin\* and Jiantai Ma\***

State Key Laboratory of Applied Organic Chemistry and College of Chemistry,  
Gansu Provincial Engineering Laboratory for chemical catalysis and Chemical  
Engineering, Lanzhou University, Lanzhou 730000, P. R. China

---

\* Corresponding authors. Tel./fax: +86 931 8912577.  
E-mail addresses: jinjun@lzu.edu.cn, majiantai@lzu.edu.cn.

Inductive coupled plasma atomic emission spectrometer (ICP-AES) analyses were conducted with Perkin Elmer (Optima-4300DV).

**Table S1** Pd loadings measured by ICP.

| Catalysts                     | Pd (wt%) |
|-------------------------------|----------|
| Pd/PTCA-GS( $\text{NaBH}_4$ ) | 14.12    |
| Pd/PTCA-GS(EG)                | 12.50    |
| Pd/PTCA-GS( $\text{H}_2$ )    | 13.92    |
| Pd/GS( $\text{NaBH}_4$ )      | 13.55    |
| Pd/GS(EG)                     | 10.40    |
| Pd/GS( $\text{H}_2$ )         | 13.32    |
| Pd/ rGO( $\text{NaBH}_4$ )    | 13.24    |
| Pd/C                          | 10.00    |

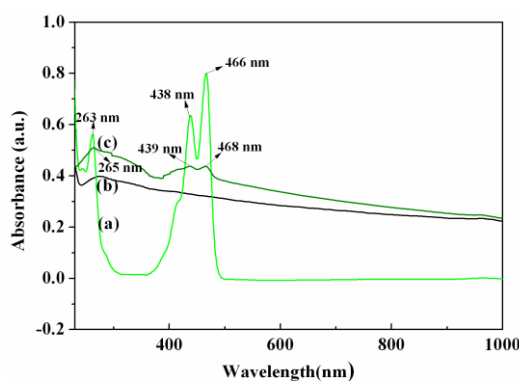

**Fig. S1** UV-vis absorption spectra of (a) PTCA ( $0.01 \text{ mg mL}^{-1}$ ), (b) GS ( $0.02 \text{ mg mL}^{-1}$ ) and (c) PTCA-GS ( $0.02 \text{ mg mL}^{-1}$ ).

To further investigate the PTCA functionalized on the surface of GS, the UV-vis spectra of PTCA, GS and PTCA-GS in water were measured and were displayed in Fig.S1. UV-Vis absorption spectra were recorded using a T6 UV-vis spectrometer. Three characteristic peaks around 263 nm, 438 nm and 466 nm were clearly observed in the spectra of PTCA, which were attributed to the PTCA molecules.<sup>1, 2</sup> The characteristic absorption of GS appeared at 276 nm corresponding to the restored  $\pi$ -conjugation network.<sup>3</sup> Compared with GS, the PTCA-GS revealed obvious absorption peaks at 265 nm, 439 nm and 468 nm. In particular, there was a slight red shift of 2 nm compared with the PTCA, which were generated by the  $\pi$ - $\pi$  stacking interaction between PTCA unit and GS.<sup>4</sup> The results of UV-Vis spectra implied that the PTCA has been successfully immobilized on the surface of GS by the  $\pi$ - $\pi$  stacking.

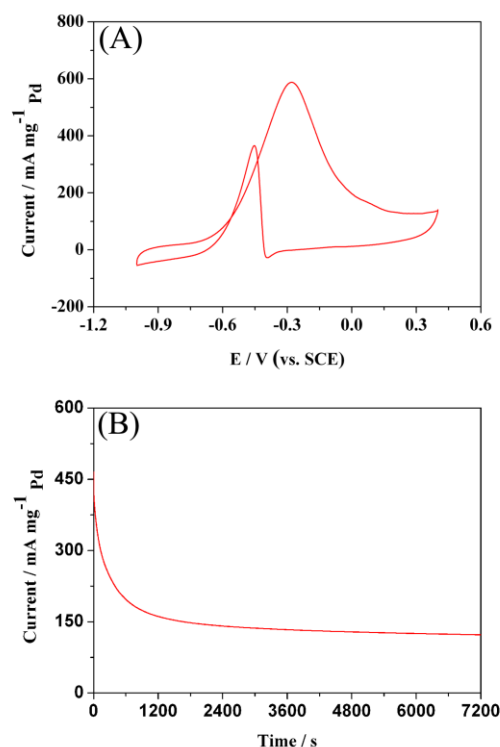

**Fig. S2** (A) CVs of Pd/rGO(NaBH<sub>4</sub>) at a scan rate of 50 mV s<sup>-1</sup> and (B) Chronoamperometric curves of Pd/rGO(NaBH<sub>4</sub>) for ethanol electrooxidation in nitrogen-saturated 1 M KOH + 1 M CH<sub>3</sub>CH<sub>2</sub>OH solution

As a comparison, the Pd NPs loading on the chemical reduced graphene (Pd/rGO(NaBH<sub>4</sub>)) was prepared and the performance of Pd/rGO(NaBH<sub>4</sub>) has been carried out (Fig. S2). The preparation process of Pd/rGO(NaBH<sub>4</sub>) was as following. The GO which was synthesized by Hummer's method<sup>5</sup> (20 mg) was dissolved in H<sub>2</sub>O (20 mL) with ultrasonic treatment to form a uniform suspension. Then, PdCl<sub>2</sub> solution (0.01 M, 3.4 mL) was added into the suspension under stirring and the mixture was stirred for 30 min in room temperature. Subsequently, the NaBH<sub>4</sub> solution (5.0 mL 0.1 M) was delivered by drops into the above suspension under continuous stirring. After reacting for 4 h at room temperature, the black solid material was separated by centrifugation, washed repeatedly with water and ethanol several times, and dried in a vacuum at 60 °C for 12 h. As shown in Fig.S2, the I<sub>f</sub> and I<sub>s</sub> (588.0 mA mg<sup>-1</sup> and 123.3 mA mg<sup>-1</sup>) for Pd/rGO(NaBH<sub>4</sub>) were lower than that of Pd/GS(NaBH<sub>4</sub>). It was due to the structural damage of graphene which adversely affects the electrical, mechanical, and stabile properties of the material because of the transformation of carbon atoms from a planar sp<sup>2</sup>-hybridized geometry to a distorted sp<sup>3</sup>-hybridized geometry.<sup>6</sup> In addition, the oxygen existing in the GO also could reduce the conductivity for

graphene. However, the  $E_s$  (-0.692 V) for the Pd/rGO(NaBH<sub>4</sub>) was more negative than those on the Pd/PTCA-GS(NaBH<sub>4</sub>) owing to the oxygen-contained groups improve the kinetics of the ethanol oxidation. All the results indicated the Pd/PTCA-GS(NaBH<sub>4</sub>, EG and H<sub>2</sub>) displayed better kinetics, higher electrocatalytic activity, better tolerance and electrochemical stability than the Pd/rGO(NaBH<sub>4</sub>).

## References

1. C. Backes, C. D. Schmidt, K. Rosenlehner, F. Hauke, J. N. Coleman and A. Hirsch, *Adv. Mater.*, 2010, **22**, 788-802.
2. C. Backes, C. D. Schmidt, F. Hauke, C. Böttcher and A. Hirsch, *J. Am. Chem. Soc.*, 2009, **131**, 2172-2184.
3. D. Li, M. B. Muller, S. Gilje, R. B. Kaner and G. G. Wallace, *Nat. Nano.*, 2008, **3**, 101-105.
4. Y. Hu, K. Wang, Q. Zhang, F. Li, T. Wu and L. Niu, *Biomaterials*, 2012, **33**, 1097-1106.
5. W. S. Hummers and R. E. Offeman, *J. Am. Chem. Soc.*, 1958, **80**, 1339-1339.
6. Y. Hernandez, V. Nicolosi, M. Lotya, F. M. Blighe, Z. Sun, S. De, I. T. McGovern, B. Holland, M. Byrne, Y. K. Gun'Ko, J. J. Boland, P. Niraj, G. Duesberg, S. Krishnamurthy, R. Goodhue, J. Hutchison, V. Scardaci, A. C. Ferrari and J. N. Coleman, *Nat. Nano.*, 2008, **3**, 563-568.
